# Supplementary material for: The Association between Blood Indexes and Immune Cell Concentrations in the Primary Tumor Microenvironment Predicting Survival of Immunotherapy in Gastric Cancer
Source: MDPI journal article supplement (doi:10.3390/cancers14153608), 2022-07-25
Supplement: s1 [file s1]

## Original Article

The association between blood indexes and immune cell concentrations in the primary tumor microenvironment predicting survival of immunotherapy in gastric cancer

**Jiajia Yuan<sup>1†</sup>, Xingwang Zhao<sup>1†</sup>, Yanyan Li<sup>1</sup>, Qian Yao<sup>2</sup>, Lei Jiang<sup>1</sup>, Xujiao Feng<sup>1</sup>, Lin Shen<sup>1</sup>, Yilin Li<sup>1\*</sup> and Yang Chen<sup>1\*</sup>**

<sup>1</sup> Department of Gastrointestinal Oncology, Key Laboratory of Carcinogenesis and Translational Research (Ministry of Education), Peking University Cancer Hospital and Institute, Beijing, 100142, China; jyuan@bjmu.edu.cn (J.J.Y.), qiuyesiyu3@163.com (YY.L.), zhaoxingwang237@163.com (XW.Z), ncuskjanglei@163.com (L.J.), 13293656798@163.com (XJ.F.), shenlin@bjmu.edu.cn (L.S.),

<sup>2</sup> Department of Pathology, Key Laboratory of Carcinogenesis and Translational Research (Ministry of Education), Peking University Cancer Hospital and Institute, Beijing, 100142, China; yaoqian@bjmu.edu.cn (Y.Q.)

† These authors contributed equally to this work.

\* Correspondence: liyilin@bjcancer.org (Y.L.), Yang\_chen@bjcancer.org (Y.C.); Tel.: 010-88196747(Y.L. & Y.C.)

Supplementary Table S1. Antibodies used for mIHC

---

|                                                  |
|--------------------------------------------------|
| CD8a (Cell Signaling Technology, Cat. CST70306)  |
| LAG-3 (Cell Signaling Technology, Cat. CST15372) |
| TIM-3 (Cell Signaling Technology, Cat. CST45208) |
| PD-1 (Cell Signaling Technology, Cat. CST43248)  |
| CD4 (Biolynx, Cat. BX22300130)                   |
| PD-L1 (Cell Signaling Technology, Cat. CST13684) |
| CTLA-4 (Abcam, Cat. ab227709)                    |
| FoxP3 (Biolegend, Cat. BLG320202)                |
| CD68 (ZSGB-BIO, Cat. ZM0060)                     |
| CD163 (Cell Signaling Technology, Cat. CST93498) |
| HLA-DR (Abcam, Cat. ab92511)                     |
| STING (Cell Signaling Technology, Cat. CST13647) |
| CD20 (Abcam, Cat. ab78237)                       |
| CD66b (Gene Tex, Cat. GTX19779)                  |
| CD147 (Cell Signaling Technology, Cat. CST13287) |
| CLDN18.2 (Abcam, Cat. ab22512)                   |
| PanCK (Cell Signaling Technology, Cat. CST4545)  |

---

Supplementary Table S2. Association between immune markers and immune cell density in the tumor microenvironment of tumor core

| Variab<br>les                       | CD8 <sup>+</sup> | CD8 <sup>+</sup><br>LAG3 | CD8 <sup>+</sup><br>LAG3 <sup>+</sup> PD1 <sup>+</sup> | CD8 <sup>+</sup><br>LAG3 <sup>-</sup> PD1 <sup>+</sup> | CD8 <sup>+</sup><br>LAG3 <sup>-</sup> PD1 <sup>-</sup> | CD8 <sup>+</sup><br>PD1 <sup>+</sup> T<br>IM3 <sup>+</sup> | CD8 <sup>+</sup><br>PD1 <sup>-</sup> T<br>IM3 <sup>+</sup> | CD8 <sup>+</sup><br>LAG3 <sup>+</sup><br>TIM3 <sup>+</sup> | CD8 <sup>+</sup><br>LAG3 <sup>-</sup><br>TIM3 <sup>-</sup> | CD8 <sup>+</sup><br>LAG3 <sup>-</sup><br>PD1 <sup>+</sup> T<br>IM3 <sup>+</sup> | CD8 <sup>+</sup><br>LAG3 <sup>-</sup><br>PD1 <sup>+</sup> T<br>IM3 <sup>-</sup> | CD4 <sup>+</sup> | CD4 <sup>+</sup><br>FOXP<br>3 <sup>+</sup> | CD4 <sup>+</sup><br>FOXP<br>3 <sup>-</sup> | CD4 <sup>+</sup><br>CTLA<br>4 <sup>+</sup> FO<br>XP3 <sup>+</sup> | CD4 <sup>+</sup><br>CTLA<br>4 <sup>+</sup> FO<br>XP3 <sup>-</sup> | CD4 <sup>+</sup><br>FOXP<br>3 <sup>+</sup> PDL<br>1 <sup>+</sup> | CD4 <sup>+</sup><br>FOXP<br>3 <sup>-</sup> PDL<br>1 <sup>+</sup> | CD68 <sup>+</sup> | CD68 <sup>+</sup><br>STIN<br>G <sup>+</sup> | CD16<br>3 <sup>+</sup> CD6<br>8 <sup>+</sup> HL<br>ADR <sup>-</sup> | CD16<br>3 <sup>-</sup> CD6<br>8 <sup>+</sup> HL<br>ADR <sup>+</sup> | CD16<br>3 <sup>+</sup> CD6<br>8 <sup>+</sup> HL<br>ADR <sup>-</sup><br>STIN<br>G <sup>+</sup> | CD16<br>3 <sup>-</sup> CD6<br>8 <sup>+</sup> HL<br>ADR <sup>+</sup><br>STIN<br>G <sup>+</sup> | CD20 <sup>+</sup> | CD66<br>B <sup>+</sup> | CLDN<br>18.2 <sup>+</sup> | CD14<br>7 <sup>+</sup> |
|-------------------------------------|------------------|--------------------------|--------------------------------------------------------|--------------------------------------------------------|--------------------------------------------------------|------------------------------------------------------------|------------------------------------------------------------|------------------------------------------------------------|------------------------------------------------------------|---------------------------------------------------------------------------------|---------------------------------------------------------------------------------|------------------|--------------------------------------------|--------------------------------------------|-------------------------------------------------------------------|-------------------------------------------------------------------|------------------------------------------------------------------|------------------------------------------------------------------|-------------------|---------------------------------------------|---------------------------------------------------------------------|---------------------------------------------------------------------|-----------------------------------------------------------------------------------------------|-----------------------------------------------------------------------------------------------|-------------------|------------------------|---------------------------|------------------------|
| Neut<br>( <i>p</i> -val<br>ue)      | 0.041            | 0.094                    | 0.038                                                  | 0.257                                                  | 0.040                                                  | 0.235                                                      | 0.015                                                      | 0.434                                                      | 0.014                                                      | 0.212                                                                           | 0.379                                                                           | 0.165            | 0.685                                      | 0.069                                      | 0.974                                                             | 0.115                                                             | 0.755                                                            | 0.193                                                            | 0.057             | 0.019                                       | 0.347                                                               | 0.046                                                               | 0.053                                                                                         | 0.049                                                                                         | 0.336             | 0.115                  | 0.228                     | 0.177                  |
| Low                                 | 311.2            | 10.0                     | 8.1                                                    | 83.3                                                   | 209.8                                                  | 16.0                                                       | 19.8                                                       | 5.2                                                        | 4.8                                                        | 10.8                                                                            | 72.5                                                                            | 567.6            | 136.1                                      | 431.5                                      | 5.2                                                               | 37.9                                                              | 47.8                                                             | 198.9                                                            | 845.4             | 87.5                                        | 21.9                                                                | 308.2                                                               | 2.4                                                                                           | 25.1                                                                                          | 216.4             | 525.0                  | 2504.8                    | 3416.7                 |
| High                                | 468.1            | 18.5                     | 19.3                                                   | 109.2                                                  | 321.0                                                  | 27.9                                                       | 56.4                                                       | 7.6                                                        | 10.9                                                       | 20.3                                                                            | 88.9                                                                            | 726.7            | 125.9                                      | 600.8                                      | 5.1                                                               | 70.0                                                              | 51.4                                                             | 272.3                                                            | 1114.9            | 166.6                                       | 31.5                                                                | 418.8                                                               | 8.6                                                                                           | 44.8                                                                                          | 300.0             | 707.9                  | 2973.2                    | 3941.6                 |
| Mono<br>( <i>p</i> -val<br>ue)      | 0.042            | 0.130                    | 0.014                                                  | 0.180                                                  | 0.054                                                  | 0.107                                                      | 0.014                                                      | 0.351                                                      | 0.052                                                      | 0.081                                                                           | 0.352                                                                           | 0.247            | 0.553                                      | 0.208                                      | 0.118                                                             | 0.140                                                             | 0.653                                                            | 0.289                                                            | 0.051             | 0.279                                       | 0.484                                                               | 0.271                                                               | 0.350                                                                                         | 0.374                                                                                         | 0.012             | 0.023                  | 0.160                     | 0.426                  |
| Low                                 | 315.4            | 10.6                     | 7.4                                                    | 81.7                                                   | 215.7                                                  | 14.4                                                       | 20.5                                                       | 5.0                                                        | 5.5                                                        | 9.3                                                                             | 72.4                                                                            | 583.9            | 123.9                                      | 460.0                                      | 3.3                                                               | 39.7                                                              | 47.1                                                             | 207.1                                                            | 848.7             | 109.4                                       | 23.3                                                                | 334.2                                                               | 4.1                                                                                           | 30.6                                                                                          | 156.5             | 491.7                  | 2479.7                    | 3531.5                 |
| High                                | 471.7            | 18.3                     | 20.6                                                   | 112.3                                                  | 320.4                                                  | 30.4                                                       | 57.6                                                       | 7.9                                                        | 10.4                                                       | 22.5                                                                            | 89.9                                                                            | 716.9            | 138.8                                      | 578.1                                      | 7.3                                                               | 69.8                                                              | 52.4                                                             | 267.1                                                            | 1125.3            | 146.5                                       | 30.5                                                                | 395.9                                                               | 7.1                                                                                           | 39.7                                                                                          | 370.6             | 754.3                  | 3025.5                    | 3842.3                 |
| Lymp<br>h<br>( <i>p</i> -val<br>ue) | 0.746            | 0.913                    | 0.405                                                  | 0.479                                                  | 0.494                                                  | 0.715                                                      | 0.101                                                      | 0.931                                                      | 0.746                                                      | 0.657                                                                           | 0.295                                                                           | 0.744            | 0.952                                      | 0.702                                      | 0.421                                                             | 0.640                                                             | 0.713                                                            | 0.923                                                            | 0.972             | 0.691                                       | 0.337                                                               | 0.916                                                               | 0.980                                                                                         | 0.340                                                                                         | 0.645             | 0.141                  | 0.509                     | 0.850                  |
| Low                                 | 376.7            | 14.6                     | 11.4                                                   | 104.6                                                  | 246.2                                                  | 20.1                                                       | 25.3                                                       | 6.3                                                        | 8.3                                                        | 13.8                                                                            | 90.8                                                                            | 627.9            | 130.2                                      | 497.7                                      | 6.3                                                               | 49.1                                                              | 47.4                                                             | 232.8                                                            | 982.7             | 120.0                                       | 21.7                                                                | 366.5                                                               | 5.5                                                                                           | 30.0                                                                                          | 237.6             | 528.6                  | 2606.9                    | 3641.2                 |
| High                                | 401.9            | 14.0                     | 15.9                                                   | 88.4                                                   | 283.7                                                  | 23.7                                                       | 50.3                                                       | 6.5                                                        | 7.5                                                        | 17.2                                                                            | 71.1                                                                            | 665.4            | 131.7                                      | 533.7                                      | 4.2                                                               | 58.6                                                              | 51.7                                                             | 238.3                                                            | 977.6             | 133.7                                       | 31.5                                                                | 360.6                                                               | 5.6                                                                                           | 39.6                                                                                          | 277.8             | 699.9                  | 2864.6                    | 3715.3                 |
| Plt<br>( <i>p</i> -val<br>ue)       | 0.253            | 0.927                    | 0.113                                                  | 0.861                                                  | 0.166                                                  | 0.648                                                      | 0.037                                                      | 0.963                                                      | 0.896                                                      | 0.561                                                                           | 0.983                                                                           | 0.192            | 0.470                                      | 0.161                                      | 0.973                                                             | 0.129                                                             | 0.295                                                            | 0.282                                                            | 0.039             | 0.183                                       | 0.099                                                               | 0.047                                                               | 0.448                                                                                         | 0.128                                                                                         | 0.398             | 0.142                  | 0.210                     | 0.358                  |
| Low                                 | 345.3            | 14.0                     | 9.4                                                    | 94.3                                                   | 227.6                                                  | 19.7                                                       | 22.3                                                       | 6.3                                                        | 7.7                                                        | 13.3                                                                            | 80.9                                                                            | 572.4            | 121.9                                      | 450.5                                      | 5.2                                                               | 38.5                                                              | 43.5                                                             | 205.2                                                            | 834.0             | 104.3                                       | 18.4                                                                | 308.3                                                               | 4.3                                                                                           | 27.2                                                                                          | 221.4             | 531.0                  | 2495.3                    | 3500.1                 |
| High                                | 434.0            | 14.5                     | 18.0                                                   | 98.3                                                   | 303.2                                                  | 24.2                                                       | 53.9                                                       | 6.5                                                        | 8.0                                                        | 17.8                                                                            | 80.5                                                                            | 721.8            | 140.0                                      | 581.7                                      | 5.1                                                               | 69.4                                                              | 55.7                                                             | 266.0                                                            | 1126.3            | 149.8                                       | 35.1                                                                | 418.7                                                               | 6.8                                                                                           | 42.6                                                                                          | 295.0             | 701.9                  | 2982.7                    | 3858.2                 |
| NLR<br>( <i>p</i> -val<br>ue)       | 0.029            | 0.015                    | 0.011                                                  | 0.039                                                  | 0.081                                                  | 0.050                                                      | 0.010                                                      | 0.079                                                      | 0.005                                                      | 0.062                                                                           | 0.080                                                                           | 0.158            | 0.575                                      | 0.059                                      | 0.793                                                             | 0.275                                                             | 0.853                                                            | 0.173                                                            | 0.131             | 0.119                                       | 0.531                                                               | 0.225                                                               | 0.089                                                                                         | 0.222                                                                                         | 0.576             | 0.371                  | 0.154                     | 0.350                  |
| Low                                 | 306.0            | 8.1                      | 6.9                                                    | 73.0                                                   | 218.1                                                  | 12.3                                                       | 18.7                                                       | 3.7                                                        | 4.4                                                        | 8.5                                                                             | 64.4                                                                            | 566.2            | 138.0                                      | 428.2                                      | 5.5                                                               | 42.8                                                              | 48.5                                                             | 197.2                                                            | 872.7             | 100.4                                       | 23.5                                                                | 329.6                                                               | 2.8                                                                                           | 28.8                                                                                          | 233.8             | 564.2                  | 2462.5                    | 3497.1                 |
| High                                | 473.3            | 20.4                     | 20.5                                                   | 119.6                                                  | 312.7                                                  | 31.7                                                       | 57.5                                                       | 9.0                                                        | 11.3                                                       | 22.6                                                                            | 97.0                                                                            | 728.0            | 124.0                                      | 604.1                                      | 4.8                                                               | 65.1                                                              | 50.7                                                             | 274.0                                                            | 1087.5            | 153.6                                       | 29.9                                                                | 397.4                                                               | 8.3                                                                                           | 41.1                                                                                          | 282.6             | 668.6                  | 3015.4                    | 3861.2                 |
| LMR<br>( <i>p</i> -val<br>ue)       | 0.096            | 0.045                    | 0.023                                                  | 0.107                                                  | 0.205                                                  | 0.101                                                      | 0.031                                                      | 0.203                                                      | 0.012                                                      | 0.100                                                                           | 0.193                                                                           | 0.581            | 0.881                                      | 0.474                                      | 0.287                                                             | 0.438                                                             | 0.902                                                            | 0.488                                                            | 0.062             | 0.452                                       | 0.512                                                               | 0.616                                                               | 0.503                                                                                         | 0.883                                                                                         | 0.876             | 0.055                  | 0.343                     | 0.539                  |
| Low                                 | 453.8            | 19.3                     | 19.8                                                   | 114.7                                                  | 300.0                                                  | 30.1                                                       | 54.4                                                       | 8.3                                                        | 11.0                                                       | 21.8                                                                            | 92.9                                                                            | 678.8            | 129.1                                      | 549.8                                      | 6.6                                                               | 61.9                                                              | 48.9                                                             | 255.2                                                            | 1112.4            | 139.9                                       | 30.1                                                                | 377.6                                                               | 6.6                                                                                           | 35.7                                                                                          | 265.0             | 727.5                  | 2923.7                    | 3799.1                 |
| High                                | 325.5            | 9.2                      | 7.6                                                    | 77.9                                                   | 230.9                                                  | 13.8                                                       | 21.8                                                       | 4.5                                                        | 4.7                                                        | 9.4                                                                             | 68.5                                                                            | 615.4            | 132.9                                      | 482.5                                      | 3.8                                                               | 46.0                                                              | 50.3                                                             | 216.0                                                            | 847.8             | 114.1                                       | 23.4                                                                | 349.4                                                               | 4.4                                                                                           | 34.2                                                                                          | 251.4             | 505.4                  | 2554.3                    | 3559.2                 |
| PLR<br>( <i>p</i> -val<br>ue)       | 0.007            | 0.268                    | 0.022                                                  | 0.016                                                  | 0.014                                                  | 0.107                                                      | 0.004                                                      | 0.324                                                      | 0.292                                                      | 0.085                                                                           | 0.026                                                                           | 0.041            | 0.264                                      | 0.027                                      | 0.628                                                             | 0.082                                                             | 0.124                                                            | 0.065                                                            | 0.004             | 0.161                                       | 0.131                                                               | 0.001                                                               | 0.467                                                                                         | 0.260                                                                                         | 0.318             | 0.423                  | 0.700                     | 0.585                  |
| Low                                 | 287.8            | 11.4                     | 7.5                                                    | 69.1                                                   | 199.6                                                  | 14.0                                                       | 16.8                                                       | 4.9                                                        | 6.5                                                        | 9.1                                                                             | 60.1                                                                            | 530.7            | 117.0                                      | 413.6                                      | 4.6                                                               | 36.3                                                              | 40.7                                                             | 183.9                                                            | 778.8             | 103.1                                       | 19.1                                                                | 276.6                                                               | 4.3                                                                                           | 29.2                                                                                          | 214.8             | 569.6                  | 2663.8                    | 3572.6                 |
| High                                | 491.5            | 17.1                     | 19.8                                                   | 123.4                                                  | 331.2                                                  | 30.0                                                       | 59.5                                                       | 7.9                                                        | 9.2                                                        | 22.1                                                                            | 101.3                                                                           | 763.5            | 144.9                                      | 618.6                                      | 5.8                                                               | 71.6                                                              | 58.5                                                             | 287.3                                                            | 1181.4            | 151.0                                       | 34.4                                                                | 450.5                                                               | 6.7                                                                                           | 40.6                                                                                          | 301.6             | 663.2                  | 2814.2                    | 3785.7                 |
| SII<br>( <i>p</i> -val<br>ue)       | 0.047            | 0.482                    | 0.029                                                  | 0.198                                                  | 0.046                                                  | 0.272                                                      | 0.012                                                      | 0.648                                                      | 0.383                                                      | 0.207                                                                           | 0.289                                                                           | 0.110            | 0.673                                      | 0.065                                      | 0.810                                                             | 0.062                                                             | 0.301                                                            | 0.197                                                            | 0.010             | 0.010                                       | 0.235                                                               | 0.002                                                               | 0.052                                                                                         | 0.041                                                                                         | 0.584             | 0.098                  | 0.413                     | 0.553                  |
| Low                                 | 313.3            | 12.5                     | 7.8                                                    | 81.6                                                   | 211.4                                                  | 16.5                                                       | 19.3                                                       | 5.7                                                        | 6.8                                                        | 10.8                                                                            | 70.8                                                                            | 555.8            | 125.7                                      | 430.1                                      | 4.9                                                               | 35.1                                                              | 43.6                                                             | 199.2                                                            | 798.4             | 83.8                                        | 20.7                                                                | 279.0                                                               | 2.4                                                                                           | 24.7                                                                                          | 234.3             | 520.5                  | 2579.3                    | 3563.4                 |

|      |       |      |      |       |       |      |      |     |     |      |      |       |       |       |     |      |      |       |        |       |      |       |     |      |       |       |        |        |
|------|-------|------|------|-------|-------|------|------|-----|-----|------|------|-------|-------|-------|-----|------|------|-------|--------|-------|------|-------|-----|------|-------|-------|--------|--------|
| High | 466.0 | 16.1 | 19.6 | 111.0 | 319.4 | 27.4 | 56.9 | 7.1 | 9.0 | 20.4 | 90.6 | 738.4 | 136.3 | 602.2 | 5.5 | 72.9 | 55.6 | 272.0 | 1161.9 | 170.3 | 32.8 | 448.1 | 8.7 | 45.2 | 282.1 | 712.3 | 2898.6 | 3794.8 |
|------|-------|------|------|-------|-------|------|------|-----|-----|------|------|-------|-------|-------|-----|------|------|-------|--------|-------|------|-------|-----|------|-------|-------|--------|--------|

Supplementary Table S3 Association between immune markers and immune cell density in the tumor microenvironment in tumor region

| Variab<br>les      | CD8 <sup>+</sup> | CD8 <sup>+</sup><br>LAG3 <sup>+</sup><br>PD1 <sup>+</sup> | CD8 <sup>+</sup><br>PD1 <sup>+</sup> T <sup>+</sup><br>IM3 <sup>+</sup> | CD8 <sup>+</sup><br>PD1 <sup>+</sup> T <sup>+</sup><br>IM3 <sup>+</sup> | CD8 <sup>+</sup><br>LAG3 <sup>+</sup><br>PD1 <sup>+</sup> T <sup>+</sup><br>TIM3 <sup>+</sup> | CD8 <sup>+</sup><br>LAG3 <sup>+</sup><br>PD1 <sup>+</sup> T <sup>+</sup><br>TIM3 <sup>+</sup> | CD8 <sup>+</sup><br>LAG3 <sup>+</sup><br>PD1 <sup>+</sup> T <sup>+</sup><br>IM3 <sup>+</sup> | CD8 <sup>+</sup><br>LAG3 <sup>+</sup><br>PD1 <sup>+</sup> T <sup>+</sup><br>IM3 <sup>+</sup> | CD4 <sup>+</sup> | CD4 <sup>+</sup><br>FOXP3 <sup>+</sup> | CD4 <sup>+</sup><br>FOXP3 <sup>+</sup> | CD4 <sup>+</sup><br>CTLA4 <sup>+</sup><br>FOXP3 <sup>+</sup> | CD4 <sup>+</sup><br>CTLA4 <sup>+</sup><br>FOXP3 <sup>+</sup> | CD4 <sup>+</sup><br>FOXP3 <sup>+</sup><br>PDL1 <sup>+</sup> | CD4 <sup>+</sup><br>FOXP3 <sup>+</sup><br>PDL1 <sup>+</sup> | CD68 <sup>+</sup> | CD68 <sup>+</sup><br>STING <sup>+</sup> | CD16<br>3 <sup>+</sup> CD6 <sup>+</sup><br>8 <sup>+</sup> HL <sup>+</sup><br>ADR <sup>+</sup> | CD16<br>3 <sup>+</sup> CD6 <sup>+</sup><br>8 <sup>+</sup> HL <sup>+</sup><br>ADR <sup>+</sup> | CD16<br>3 <sup>+</sup> CD6 <sup>+</sup><br>8 <sup>+</sup> HL <sup>+</sup><br>ADR <sup>+</sup> | CD16<br>3 <sup>+</sup> CD6 <sup>+</sup><br>8 <sup>+</sup> HL <sup>+</sup><br>ADR <sup>+</sup> | CD20 <sup>+</sup> | CD66<br>B <sup>+</sup> | CLDN<br>18.2 <sup>+</sup> | CD14<br>7 <sup>+</sup> |
|--------------------|------------------|-----------------------------------------------------------|-----------------------------------------------------------|-----------------------------------------------------------|-----------------------------------------------------------|-------------------------------------------------------------------------|-------------------------------------------------------------------------|-----------------------------------------------------------------------------------------------|-----------------------------------------------------------------------------------------------|----------------------------------------------------------------------------------------------|----------------------------------------------------------------------------------------------|------------------|----------------------------------------|----------------------------------------|--------------------------------------------------------------|--------------------------------------------------------------|-------------------------------------------------------------|-------------------------------------------------------------|-------------------|-----------------------------------------|-----------------------------------------------------------------------------------------------|-----------------------------------------------------------------------------------------------|-----------------------------------------------------------------------------------------------|-----------------------------------------------------------------------------------------------|-------------------|------------------------|---------------------------|------------------------|
| Neut<br>(p-value)  | 0.155            | 0.198                                                     | 0.069                                                     | 0.758                                                     | 0.136                                                     | 0.620                                                                   | 0.026                                                                   | 0.710                                                                                         | 0.034                                                                                         | 0.565                                                                                        | 0.834                                                                                        | 0.328            | 0.605                                  | 0.171                                  | 0.814                                                        | 0.208                                                        | 0.583                                                       | 0.127                                                       | 0.044             | 0.043                                   | 0.215                                                                                         | 0.024                                                                                         | 0.182                                                                                         | 0.035                                                                                         | 0.068             | 0.100                  | 0.336                     | 0.600                  |
| Low                | 206.1            | 9.7                                                       | 6.8                                                       | 60.1                                                      | 129.5                                                     | 12.1                                                                    | 13.4                                                                    | 5.2                                                                                           | 4.5                                                                                           | 6.9                                                                                          | 53.2                                                                                         | 358.1            | 89.5                                   | 268.6                                  | 3.7                                                          | 25.5                                                         | 32.4                                                        | 130.2                                                       | 800.9             | 61.8                                    | 15.0                                                                                          | 293.0                                                                                         | 1.8                                                                                           | 19.3                                                                                          | 108.0             | 459.6                  | 3748.5                    | 4464.5                 |
| High               | 302.3            | 15.9                                                      | 15.3                                                      | 65.3                                                      | 205.8                                                     | 15.1                                                                    | 35.3                                                                    | 6.3                                                                                           | 9.6                                                                                           | 8.8                                                                                          | 56.4                                                                                         | 458.2            | 77.6                                   | 380.7                                  | 4.3                                                          | 50.7                                                         | 38.1                                                        | 209.9                                                       | 1173.6            | 135.7                                   | 33.1                                                                                          | 466.8                                                                                         | 11.4                                                                                          | 42.8                                                                                          | 225.9             | 672.6                  | 4311.2                    | 4701.9                 |
| Mono<br>(p-value)  | 0.090            | 0.376                                                     | 0.033                                                     | 0.594                                                     | 0.075                                                     | 0.398                                                                   | 0.018                                                                   | 0.634                                                                                         | 0.238                                                                                         | 0.263                                                                                        | 0.736                                                                                        | 0.082            | 0.107                                  | 0.087                                  | 0.057                                                        | 0.094                                                        | 0.168                                                       | 0.175                                                       | 0.004             | 0.271                                   | 0.681                                                                                         | 0.015                                                                                         | 0.718                                                                                         | 0.124                                                                                         | 0.012             | 0.046                  | 0.216                     | 0.878                  |
| Low                | 199.9            | 10.8                                                      | 6.3                                                       | 58.4                                                      | 124.4                                                     | 11.1                                                                    | 13.3                                                                    | 5.1                                                                                           | 5.7                                                                                           | 6.0                                                                                          | 52.3                                                                                         | 324.0            | 65.9                                   | 258.1                                  | 1.5                                                          | 22.2                                                         | 28.6                                                        | 136.3                                                       | 739.0             | 79.5                                    | 26.9                                                                                          | 291.3                                                                                         | 7.8                                                                                           | 22.8                                                                                          | 90.6              | 443.9                  | 3686.8                    | 4550.2                 |
| High               | 314.2            | 15.0                                                      | 16.3                                                      | 67.4                                                      | 215.5                                                     | 16.3                                                                    | 36.5                                                                    | 6.5                                                                                           | 8.5                                                                                           | 9.8                                                                                          | 57.6                                                                                         | 501.2            | 103.0                                  | 398.2                                  | 6.8                                                          | 55.7                                                         | 42.6                                                        | 207.3                                                       | 1261.7            | 120.0                                   | 20.8                                                                                          | 477.9                                                                                         | 5.2                                                                                           | 40.2                                                                                          | 251.3             | 701.2                  | 4409.0                    | 4619.7                 |
| Lymph<br>(p-value) | 0.864            | 0.715                                                     | 0.781                                                     | 0.163                                                     | 0.812                                                     | 0.997                                                                   | 0.134                                                                   | 0.966                                                                                         | 0.438                                                                                         | 0.976                                                                                        | 0.128                                                                                        | 0.783            | 0.877                                  | 0.764                                  | 0.567                                                        | 0.627                                                        | 0.472                                                       | 0.565                                                       | 0.895             | 0.719                                   | 0.846                                                                                         | 0.977                                                                                         | 0.461                                                                                         | 0.415                                                                                         | 0.817             | 0.147                  | 0.447                     | 0.909                  |
| Low                | 260.2            | 13.7                                                      | 10.4                                                      | 74.7                                                      | 161.4                                                     | 13.6                                                                    | 16.7                                                                    | 5.7                                                                                           | 8.0                                                                                           | 7.9                                                                                          | 66.8                                                                                         | 393.7            | 81.7                                   | 312.0                                  | 4.8                                                          | 33.1                                                         | 31.5                                                        | 154.5                                                       | 974.5             | 91.9                                    | 25.5                                                                                          | 378.7                                                                                         | 9.3                                                                                           | 26.3                                                                                          | 174.7             | 469.7                  | 3801.8                    | 4556.5                 |
| High               | 248.5            | 11.9                                                      | 11.7                                                      | 51.2                                                      | 173.6                                                     | 13.6                                                                    | 31.6                                                                    | 5.8                                                                                           | 6.1                                                                                           | 7.8                                                                                          | 43.4                                                                                         | 422.0            | 85.3                                   | 336.7                                  | 3.2                                                          | 42.9                                                         | 38.8                                                        | 184.8                                                       | 999.3             | 105.2                                   | 22.6                                                                                          | 381.0                                                                                         | 4.0                                                                                           | 35.6                                                                                          | 159.6             | 657.8                  | 4246.7                    | 4608.5                 |
| Plt<br>(p-value)   | 0.900            | 0.524                                                     | 0.299                                                     | 0.202                                                     | 0.830                                                     | 0.776                                                                   | 0.085                                                                   | 0.808                                                                                         | 0.331                                                                                         | 0.761                                                                                        | 0.184                                                                                        | 0.528            | 0.972                                  | 0.437                                  | 0.731                                                        | 0.321                                                        | 0.375                                                       | 0.280                                                       | 0.052             | 0.666                                   | 0.838                                                                                         | 0.056                                                                                         | 0.597                                                                                         | 0.245                                                                                         | 0.084             | 0.108                  | 0.305                     | 0.496                  |
| Low                | 258.5            | 14.3                                                      | 8.6                                                       | 73.4                                                      | 162.1                                                     | 14.5                                                                    | 15.8                                                                    | 6.1                                                                                           | 8.2                                                                                           | 8.3                                                                                          | 65.0                                                                                         | 375.8            | 83.1                                   | 292.7                                  | 4.5                                                          | 28.1                                                         | 30.7                                                        | 141.7                                                       | 807.3             | 90.8                                    | 22.5                                                                                          | 305.9                                                                                         | 8.5                                                                                           | 24.5                                                                                          | 111.1             | 462.0                  | 3730.4                    | 4429.4                 |
| High               | 249.9            | 11.3                                                      | 13.5                                                      | 51.9                                                      | 173.2                                                     | 12.7                                                                    | 32.8                                                                    | 5.4                                                                                           | 5.9                                                                                           | 7.3                                                                                          | 44.6                                                                                         | 440.6            | 83.9                                   | 356.6                                  | 3.5                                                          | 48.1                                                         | 39.8                                                        | 198.4                                                       | 1167.2            | 106.7                                   | 25.5                                                                                          | 453.9                                                                                         | 4.7                                                                                           | 37.6                                                                                          | 222.8             | 670.2                  | 4329.2                    | 4737.0                 |
| NLR<br>(p-value)   | 0.083            | 0.038                                                     | 0.006                                                     | 0.207                                                     | 0.153                                                     | 0.169                                                                   | 0.006                                                                   | 0.169                                                                                         | 0.015                                                                                         | 0.193                                                                                        | 0.276                                                                                        | 0.467            | 0.389                                  | 0.249                                  | 0.874                                                        | 0.494                                                        | 0.646                                                       | 0.128                                                       | 0.148             | 0.316                                   | 0.321                                                                                         | 0.274                                                                                         | 0.198                                                                                         | 0.495                                                                                         | 0.088             | 0.315                  | 0.247                     | 0.794                  |
| Low                | 195.8            | 7.9                                                       | 4.7                                                       | 52.0                                                      | 131.1                                                     | 9.4                                                                     | 11.0                                                                    | 3.7                                                                                           | 4.1                                                                                           | 5.6                                                                                          | 46.4                                                                                         | 370.9            | 93.5                                   | 277.4                                  | 4.2                                                          | 31.2                                                         | 32.9                                                        | 130.3                                                       | 852.4             | 80.3                                    | 16.7                                                                                          | 337.3                                                                                         | 2.0                                                                                           | 27.2                                                                                          | 111.7             | 500.7                  | 3692.3                    | 4524.0                 |
| High               | 312.6            | 17.7                                                      | 17.4                                                      | 73.3                                                      | 204.2                                                     | 17.8                                                                    | 37.7                                                                    | 7.8                                                                                           | 10.0                                                                                          | 10.0                                                                                         | 63.2                                                                                         | 445.5            | 73.6                                   | 371.9                                  | 3.8                                                          | 45.0                                                         | 37.6                                                        | 209.7                                                       | 1122.1            | 117.2                                   | 31.3                                                                                          | 422.5                                                                                         | 11.2                                                                                          | 34.9                                                                                          | 222.2             | 631.5                  | 4367.4                    | 4642.4                 |
| LMR<br>(p-value)   | 0.061            | 0.061                                                     | 0.011                                                     | 0.171                                                     | 0.108                                                     | 0.209                                                                   | 0.012                                                                   | 0.297                                                                                         | 0.014                                                                                         | 0.170                                                                                        | 0.232                                                                                        | 0.325            | 0.665                                  | 0.268                                  | 0.189                                                        | 0.259                                                        | 0.550                                                       | 0.230                                                       | 0.019             | 0.748                                   | 0.656                                                                                         | 0.200                                                                                         | 0.652                                                                                         | 0.796                                                                                         | 0.171             | 0.064                  | 0.533                     | 0.488                  |
| Low                | 317.2            | 17.3                                                      | 17.0                                                      | 74.2                                                      | 208.7                                                     | 17.4                                                                    | 36.7                                                                    | 7.3                                                                                           | 10.0                                                                                          | 10.2                                                                                         | 64.0                                                                                         | 458.6            | 88.5                                   | 370.1                                  | 5.8                                                          | 49.4                                                         | 38.3                                                        | 201.5                                                       | 1204.2            | 104.7                                   | 20.7                                                                                          | 429.8                                                                                         | 5.0                                                                                           | 32.5                                                                                          | 211.4             | 685.8                  | 4212.2                    | 4740.0                 |
| High               | 191.2            | 8.3                                                       | 5.2                                                       | 51.1                                                      | 126.6                                                     | 9.7                                                                     | 12.0                                                                    | 4.2                                                                                           | 4.1                                                                                           | 5.5                                                                                          | 45.6                                                                                         | 357.8            | 78.5                                   | 279.2                                  | 2.2                                                          | 26.8                                                         | 32.2                                                        | 138.6                                                       | 770.3             | 92.8                                    | 27.3                                                                                          | 330.0                                                                                         | 8.2                                                                                           | 29.6                                                                                          | 122.5             | 446.4                  | 3847.4                    | 4426.4                 |
| PLR<br>(p-value)   | 0.092            | 0.666                                                     | 0.057                                                     | 0.174                                                     | 0.119                                                     | 0.546                                                                   | 0.033                                                                   | 0.657                                                                                         | 0.752                                                                                         | 0.477                                                                                        | 0.184                                                                                        | 0.201            | 0.832                                  | 0.124                                  | 0.619                                                        | 0.183                                                        | 0.175                                                       | 0.085                                                       | 0.005             | 0.498                                   | 0.926                                                                                         | 0.001                                                                                         | 0.607                                                                                         | 0.182                                                                                         | 0.020             | 0.514                  | 0.906                     | 0.698                  |
| Low                | 197.4            | 11.8                                                      | 6.6                                                       | 51.2                                                      | 127.8                                                     | 11.7                                                                    | 13.8                                                                    | 5.1                                                                                           | 6.7                                                                                           | 6.6                                                                                          | 44.6                                                                                         | 342.9            | 81.1                                   | 261.8                                  | 3.3                                                          | 24.7                                                         | 28.4                                                        | 125.2                                                       | 730.3             | 86.2                                    | 23.3                                                                                          | 251.9                                                                                         | 8.5                                                                                           | 23.5                                                                                          | 92.1              | 523.6                  | 4064.4                    | 4671.1                 |
| High               | 311.0            | 13.8                                                      | 15.5                                                      | 74.1                                                      | 207.5                                                     | 15.4                                                                    | 34.8                                                                    | 6.4                                                                                           | 7.4                                                                                           | 9.0                                                                                          | 65.0                                                                                         | 473.5            | 86.0                                   | 387.5                                  | 4.7                                                          | 51.5                                                         | 42.2                                                        | 214.9                                                       | 1244.2            | 111.2                                   | 24.7                                                                                          | 508.0                                                                                         | 4.7                                                                                           | 38.6                                                                                          | 241.8             | 608.6                  | 3995.2                    | 4495.3                 |
| SII<br>(p-value)   | 0.396            | 0.981                                                     | 0.064                                                     | 0.988                                                     | 0.338                                                     | 0.963                                                                   | 0.047                                                                   | 0.964                                                                                         | 0.993                                                                                         | 0.901                                                                                        | 0.965                                                                                        | 0.313            | 0.851                                  | 0.189                                  | 0.813                                                        | 0.167                                                        | 0.343                                                       | 0.149                                                       | 0.015             | 0.038                                   | 0.159                                                                                         | 0.002                                                                                         | 0.178                                                                                         | 0.030                                                                                         | 0.104             | 0.127                  | 0.565                     | 0.880                  |
| Low                | 225.4            | 12.9                                                      | 6.7                                                       | 62.8                                                      | 143.0                                                     | 13.4                                                                    | 14.6                                                                    | 5.8                                                                                           | 7.0                                                                                           | 7.6                                                                                          | 55.2                                                                                         | 356.6            | 85.7                                   | 270.9                                  | 3.7                                                          | 24.3                                                         | 30.4                                                        | 132.3                                                       | 763.3             | 60.9                                    | 13.7                                                                                          | 261.7                                                                                         | 1.8                                                                                           | 18.9                                                                                          | 114.3             | 467.3                  | 3861.4                    | 4617.3                 |
| High               | 283.0            | 12.7                                                      | 15.4                                                      | 62.5                                                      | 192.3                                                     | 13.7                                                                    | 34.1                                                                    | 5.7                                                                                           | 7.1                                                                                           | 8.0                                                                                          | 54.5                                                                                         | 459.8            | 81.4                                   | 378.5                                  | 4.3                                                          | 51.9                                                         | 40.1                                                        | 207.8                                                       | 1211.2            | 136.6                                   | 34.3                                                                                          | 498.1                                                                                         | 11.4                                                                                          | 43.2                                                                                          | 219.6             | 664.9                  | 4198.3                    | 4549.1                 |



Supplementary Table S4 Association between immune markers and immune cell density in the tumor microenvironment in stromal region

| Variabl<br>es         | CD8 <sup>+</sup> | CD8 <sup>+</sup><br>LAG3 <sup>+</sup><br>PD1 <sup>+</sup> | CD8 <sup>+</sup><br>LAG3 <sup>+</sup><br>PD1 <sup>+</sup> | CD8 <sup>+</sup><br>LAG3 <sup>-</sup><br>PD1 <sup>+</sup> | CD8 <sup>+</sup><br>LAG3 <sup>-</sup><br>PD1 <sup>-</sup> | CD8 <sup>+</sup><br>PD1 <sup>+</sup> T<br>IM3 <sup>+</sup> | CD8 <sup>+</sup><br>PD1 <sup>-</sup> T<br>IM3 <sup>+</sup> | CD8 <sup>+</sup><br>LAG3 <sup>+</sup><br>PD1 <sup>+</sup><br>TIM3 <sup>+</sup> | CD8 <sup>+</sup><br>LAG3 <sup>+</sup><br>PD1 <sup>+</sup><br>TIM3 <sup>-</sup> | CD8 <sup>+</sup><br>LAG3 <sup>-</sup><br>PD1 <sup>+</sup> T<br>IM3 <sup>+</sup> | CD8 <sup>+</sup><br>LAG3 <sup>-</sup><br>PD1 <sup>+</sup> T<br>IM3 <sup>-</sup> | CD4 <sup>+</sup> | CD4 <sup>+</sup><br>FOXP<br>3 <sup>+</sup> | CD4 <sup>+</sup><br>FOXP<br>3 <sup>-</sup> | CD4 <sup>+</sup><br>CTLA<br>4 <sup>+</sup> FO<br>XP3 <sup>+</sup> | CD4 <sup>+</sup><br>CTLA<br>4 <sup>+</sup> FO<br>XP3 <sup>-</sup> | CD4 <sup>+</sup><br>FOXP<br>3 <sup>+</sup> PDL<br>1 <sup>+</sup> | CD4 <sup>+</sup><br>FOXP<br>3 <sup>-</sup> PDL<br>1 <sup>+</sup> | CD68 <sup>+</sup> | CD68 <sup>+</sup><br>STIN<br>G <sup>+</sup> | CD16<br>3 <sup>+</sup> CD6<br>8 <sup>+</sup> HL<br>ADR <sup>-</sup> | CD16<br>3 <sup>-</sup> CD6<br>8 <sup>+</sup> HL<br>ADR <sup>+</sup> | CD16<br>3 <sup>+</sup> CD6<br>8 <sup>+</sup> HL<br>ADR <sup>-</sup><br>STIN<br>G <sup>+</sup> | CD16<br>3 <sup>-</sup> CD6<br>8 <sup>+</sup> HL<br>ADR <sup>+</sup><br>STIN<br>G <sup>+</sup> | CD20 <sup>+</sup> | CD66<br>B <sup>+</sup> | CLDN<br>18.2 <sup>+</sup> | CD14<br>7 <sup>+</sup> |
|-----------------------|------------------|-----------------------------------------------------------|-----------------------------------------------------------|-----------------------------------------------------------|-----------------------------------------------------------|------------------------------------------------------------|------------------------------------------------------------|--------------------------------------------------------------------------------|--------------------------------------------------------------------------------|---------------------------------------------------------------------------------|---------------------------------------------------------------------------------|------------------|--------------------------------------------|--------------------------------------------|-------------------------------------------------------------------|-------------------------------------------------------------------|------------------------------------------------------------------|------------------------------------------------------------------|-------------------|---------------------------------------------|---------------------------------------------------------------------|---------------------------------------------------------------------|-----------------------------------------------------------------------------------------------|-----------------------------------------------------------------------------------------------|-------------------|------------------------|---------------------------|------------------------|
| Neut<br>(p-val<br>e)  | 0.028            | 0.079                                                     | 0.065                                                     | 0.132                                                     | 0.031                                                     | 0.298                                                      | 0.039                                                      | 0.347                                                                          | 0.025                                                                          | 0.310                                                                           | 0.162                                                                           | 0.092            | 0.947                                      | 0.043                                      | 0.720                                                             | 0.095                                                             | 0.832                                                            | 0.242                                                            | 0.117             | 0.053                                       | 0.440                                                               | 0.278                                                               | 0.048                                                                                         | 0.453                                                                                         | 0.508             | 0.675                  | 0.108                     | 0.025                  |
| Low                   | 444.2            | 10.3                                                      | 9.8                                                       | 117.1                                                     | 307.0                                                     | 23.2                                                       | 31.2                                                       | 5.4                                                                            | 4.9                                                                            | 17.9                                                                            | 99.2                                                                            | 887.4            | 215.2                                      | 672.2                                      | 6.9                                                               | 50.0                                                              | 73.0                                                             | 295.5                                                            | 827.5             | 126.3                                       | 30.4                                                                | 296.2                                                               | 2.9                                                                                           | 37.0                                                                                          | 325.1             | 734.7                  | 826.2                     | 1515.4                 |
| High                  | 654.6            | 20.4                                                      | 21.0                                                      | 164.1                                                     | 449.0                                                     | 36.8                                                       | 71.1                                                       | 8.4                                                                            | 12.1                                                                           | 28.4                                                                            | 135.7                                                                           | 1201.0           | 212.8                                      | 988.2                                      | 7.9                                                               | 103.5                                                             | 77.1                                                             | 406.8                                                            | 1039.9            | 211.6                                       | 41.3                                                                | 364.2                                                               | 11.7                                                                                          | 48.4                                                                                          | 406.8             | 804.8                  | 490.1                     | 2340.0                 |
| Mono<br>(p-val<br>e)  | 0.063            | 0.062                                                     | 0.022                                                     | 0.114                                                     | 0.112                                                     | 0.109                                                      | 0.043                                                      | 0.219                                                                          | 0.031                                                                          | 0.103                                                                           | 0.213                                                                           | 0.548            | 0.689                                      | 0.420                                      | 0.338                                                             | 0.279                                                             | 0.939                                                            | 0.390                                                            | 0.920             | 0.724                                       | 0.423                                                               | 0.478                                                               | 0.258                                                                                         | 0.794                                                                                         | 0.060             | 0.023                  | 0.440                     | 0.028                  |
| Low                   | 464.0            | 10.2                                                      | 8.8                                                       | 117.1                                                     | 327.9                                                     | 20.1                                                       | 32.6                                                       | 5.0                                                                            | 5.2                                                                            | 15.1                                                                            | 102.0                                                                           | 990.6            | 221.0                                      | 769.6                                      | 6.1                                                               | 60.2                                                              | 75.7                                                             | 312.2                                                            | 940.2             | 161.5                                       | 30.5                                                                | 351.4                                                               | 4.9                                                                                           | 44.6                                                                                          | 256.5             | 591.5                  | 580.9                     | 1541.9                 |
| High                  | 643.7            | 21.0                                                      | 22.7                                                      | 166.5                                                     | 433.4                                                     | 40.9                                                       | 71.7                                                       | 8.9                                                                            | 12.1                                                                           | 32.0                                                                            | 134.6                                                                           | 1103.5           | 206.2                                      | 897.2                                      | 8.9                                                               | 95.1                                                              | 74.3                                                             | 394.3                                                            | 926.5             | 177.2                                       | 41.8                                                                | 306.8                                                               | 9.9                                                                                           | 40.6                                                                                          | 486.9             | 966.8                  | 743.6                     | 2354.1                 |
| Lymph<br>(p-val<br>e) | 0.756            | 0.912                                                     | 0.331                                                     | 0.470                                                     | 0.476                                                     | 0.892                                                      | 0.109                                                      | 0.820                                                                          | 0.980                                                                          | 0.811                                                                           | 0.335                                                                           | 0.592            | 0.677                                      | 0.591                                      | 0.168                                                             | 0.530                                                             | 0.536                                                            | 0.318                                                            | 0.727             | 0.941                                       | 0.786                                                               | 0.718                                                               | 0.684                                                                                         | 0.683                                                                                         | 0.442             | 0.311                  | 0.727                     | 0.213                  |
| Low                   | 533.9            | 15.7                                                      | 12.3                                                      | 152.3                                                     | 353.6                                                     | 29.1                                                       | 35.2                                                       | 7.3                                                                            | 8.4                                                                            | 21.8                                                                            | 130.4                                                                           | 1095.8           | 221.9                                      | 873.9                                      | 9.4                                                               | 87.1                                                              | 81.1                                                             | 400.0                                                            | 909.3             | 170.7                                       | 33.9                                                                | 318.6                                                               | 8.2                                                                                           | 39.5                                                                                          | 317.3             | 683.1                  | 620.4                     | 1690.0                 |
| High                  | 564.1            | 15.0                                                      | 18.3                                                      | 129.5                                                     | 401.2                                                     | 30.9                                                       | 66.3                                                       | 6.5                                                                            | 8.5                                                                            | 24.3                                                                            | 105.2                                                                           | 995.2            | 206.5                                      | 788.7                                      | 5.5                                                               | 66.9                                                              | 69.3                                                             | 304.8                                                            | 957.0             | 167.3                                       | 37.7                                                                | 341.2                                                               | 6.4                                                                                           | 45.7                                                                                          | 412.2             | 852.2                  | 694.1                     | 2153.9                 |
| Plt<br>(p-val<br>e)   | 0.046            | 0.367                                                     | 0.053                                                     | 0.359                                                     | 0.027                                                     | 0.617                                                      | 0.023                                                      | 0.717                                                                          | 0.204                                                                          | 0.606                                                                           | 0.371                                                                           | 0.125            | 0.195                                      | 0.130                                      | 0.316                                                             | 0.060                                                             | 0.277                                                            | 0.289                                                            | 0.150             | 0.166                                       | 0.167                                                               | 0.221                                                               | 0.230                                                                                         | 0.575                                                                                         | 0.758             | 0.223                  | 0.368                     | 0.015                  |
| Low                   | 453.5            | 12.7                                                      | 9.5                                                       | 126.2                                                     | 305.1                                                     | 26.7                                                       | 29.3                                                       | 6.3                                                                            | 6.4                                                                            | 20.4                                                                            | 105.8                                                                           | 901.3            | 190.2                                      | 711.1                                      | 6.0                                                               | 46.8                                                              | 64.7                                                             | 300.6                                                            | 836.2             | 138.4                                       | 26.1                                                                | 291.9                                                               | 4.6                                                                                           | 38.5                                                                                          | 346.9             | 668.3                  | 563.4                     | 1481.0                 |
| High                  | 645.2            | 18.0                                                      | 21.3                                                      | 155.0                                                     | 451.0                                                     | 33.3                                                       | 73.0                                                       | 7.5                                                                            | 10.5                                                                           | 25.8                                                                            | 129.2                                                                           | 1187.2           | 237.8                                      | 949.4                                      | 8.9                                                               | 106.8                                                             | 85.4                                                             | 401.7                                                            | 1031.2            | 199.6                                       | 45.6                                                                | 368.5                                                               | 10.0                                                                                          | 47.0                                                                                          | 385.0             | 871.2                  | 752.9                     | 2374.4                 |
| NLR<br>(p-val<br>e)   | 0.028            | 0.017                                                     | 0.015                                                     | 0.021                                                     | 0.093                                                     | 0.080                                                      | 0.038                                                      | 0.056                                                                          | 0.016                                                                          | 0.107                                                                           | 0.034                                                                           | 0.108            | 0.707                                      | 0.045                                      | 0.958                                                             | 0.244                                                             | 0.781                                                            | 0.292                                                            | 0.221             | 0.174                                       | 0.508                                                               | 0.432                                                               | 0.091                                                                                         | 0.386                                                                                         | 0.856             | 0.854                  | 0.374                     | 0.085                  |
| Low                   | 443.6            | 8.5                                                       | 8.0                                                       | 104.8                                                     | 322.3                                                     | 18.7                                                       | 31.1                                                       | 3.9                                                                            | 4.6                                                                            | 14.8                                                                            | 90.0                                                                            | 894.4            | 220.9                                      | 673.5                                      | 7.4                                                               | 58.0                                                              | 77.7                                                             | 300.9                                                            | 850.6             | 138.9                                       | 31.2                                                                | 305.5                                                               | 3.5                                                                                           | 36.2                                                                                          | 377.2             | 785.1                  | 751.9                     | 1608.3                 |
| High                  | 655.1            | 22.2                                                      | 22.8                                                      | 176.4                                                     | 433.8                                                     | 41.3                                                       | 71.2                                                       | 9.9                                                                            | 12.3                                                                           | 31.4                                                                            | 144.9                                                                           | 1194.0           | 207.0                                      | 987.0                                      | 7.5                                                               | 95.5                                                              | 72.4                                                             | 401.4                                                            | 1016.9            | 199.1                                       | 40.5                                                                | 354.8                                                               | 11.0                                                                                          | 49.3                                                                                          | 354.7             | 754.4                  | 564.5                     | 2247.1                 |
| LMR<br>(p-val<br>e)   | 0.303            | 0.075                                                     | 0.043                                                     | 0.165                                                     | 0.611                                                     | 0.203                                                      | 0.136                                                      | 0.183                                                                          | 0.058                                                                          | 0.235                                                                           | 0.234                                                                           | 0.648            | 0.686                                      | 0.525                                      | 0.458                                                             | 0.537                                                             | 0.993                                                            | 0.474                                                            | 0.575             | 0.693                                       | 0.416                                                               | 0.611                                                               | 0.402                                                                                         | 0.759                                                                                         | 0.544             | 0.079                  | 0.265                     | 0.259                  |
| Low                   | 599.4            | 20.5                                                      | 21.6                                                      | 162.3                                                     | 395.0                                                     | 38.3                                                       | 65.6                                                       | 9.0                                                                            | 11.5                                                                           | 29.3                                                                            | 133.0                                                                           | 1087.1           | 206.5                                      | 880.6                                      | 8.5                                                               | 86.7                                                              | 75.1                                                             | 385.3                                                            | 972.0             | 177.8                                       | 41.6                                                                | 314.2                                                               | 9.2                                                                                           | 40.4                                                                                          | 328.5             | 915.2                  | 775.3                     | 2137.9                 |
| High                  | 499.3            | 10.2                                                      | 9.2                                                       | 118.9                                                     | 361.0                                                     | 21.7                                                       | 36.6                                                       | 4.8                                                                            | 5.4                                                                            | 17.0                                                                            | 101.9                                                                           | 1001.3           | 221.4                                      | 779.9                                      | 6.4                                                               | 66.8                                                              | 75.0                                                             | 317.0                                                            | 895.5             | 160.2                                       | 30.1                                                                | 346.2                                                               | 5.4                                                                                           | 45.0                                                                                          | 403.4             | 624.3                  | 541.0                     | 1717.5                 |
| PLR<br>(p-val<br>e)   | 0.002            | 0.101                                                     | 0.019                                                     | 0.008                                                     | 0.004                                                     | 0.084                                                      | 0.002                                                      | 0.119                                                                          | 0.155                                                                          | 0.091                                                                           | 0.013                                                                           | 0.055            | 0.149                                      | 0.052                                      | 0.335                                                             | 0.075                                                             | 0.158                                                            | 0.112                                                            | 0.117             | 0.191                                       | 0.173                                                               | 0.378                                                               | 0.251                                                                                         | 0.722                                                                                         | 0.969             | 0.670                  | 0.886                     | 0.035                  |
| Low                   | 401.8            | 10.6                                                      | 8.3                                                       | 99.8                                                      | 283.1                                                     | 18.8                                                       | 21.8                                                       | 4.4                                                                            | 6.2                                                                            | 14.4                                                                            | 85.4                                                                            | 865.7            | 187.6                                      | 678.2                                      | 6.1                                                               | 48.3                                                              | 61.6                                                             | 275.9                                                            | 827.7             | 140.0                                       | 26.3                                                                | 302.6                                                               | 4.7                                                                                           | 40.0                                                                                          | 368.3             | 734.1                  | 673.3                     | 1539.9                 |
| High                  | 697.0            | 20.1                                                      | 22.5                                                      | 181.4                                                     | 472.9                                                     | 41.2                                                       | 80.5                                                       | 9.3                                                                            | 10.8                                                                           | 31.8                                                                            | 149.6                                                                           | 1222.7           | 240.4                                      | 982.3                                      | 8.8                                                               | 105.2                                                             | 88.5                                                             | 426.4                                                            | 1039.8            | 197.9                                       | 45.4                                                                | 357.8                                                               | 9.9                                                                                           | 45.4                                                                                          | 363.6             | 805.4                  | 643.0                     | 2315.5                 |
| SII<br>(p-val<br>e)   | 0.012            | 0.151                                                     | 0.026                                                     | 0.063                                                     | 0.014                                                     | 0.189                                                      | 0.011                                                      | 0.269                                                                          | 0.134                                                                          | 0.191                                                                           | 0.087                                                                           | 0.059            | 0.293                                      | 0.046                                      | 0.373                                                             | 0.049                                                             | 0.298                                                            | 0.238                                                            | 0.027             | 0.045                                       | 0.340                                                               | 0.093                                                               | 0.053                                                                                         | 0.515                                                                                         | 0.982             | 0.521                  | 0.236                     | 0.078                  |
| Low                   | 429.2            | 11.2                                                      | 8.6                                                       | 111.6                                                     | 297.8                                                     | 21.5                                                       | 26.9                                                       | 5.1                                                                            | 6.0                                                                            | 16.3                                                                            | 95.3                                                                            | 868.7            | 194.6                                      | 674.0                                      | 6.2                                                               | 45.4                                                              | 65.1                                                             | 295.1                                                            | 784.9             | 124.9                                       | 29.1                                                                | 277.8                                                               | 3.0                                                                                           | 37.8                                                                                          | 367.4             | 716.2                  | 782.8                     | 1601.1                 |
| High                  | 669.6            | 19.5                                                      | 22.2                                                      | 169.6                                                     | 458.3                                                     | 38.5                                                       | 75.4                                                       | 8.6                                                                            | 10.9                                                                           | 29.9                                                                            | 139.7                                                                           | 1219.7           | 233.3                                      | 986.4                                      | 8.7                                                               | 108.1                                                             | 85.0                                                             | 407.3                                                            | 1082.5            | 213.0                                       | 42.6                                                                | 382.6                                                               | 11.6                                                                                          | 47.6                                                                                          | 364.5             | 823.3                  | 533.6                     | 2254.3                 |





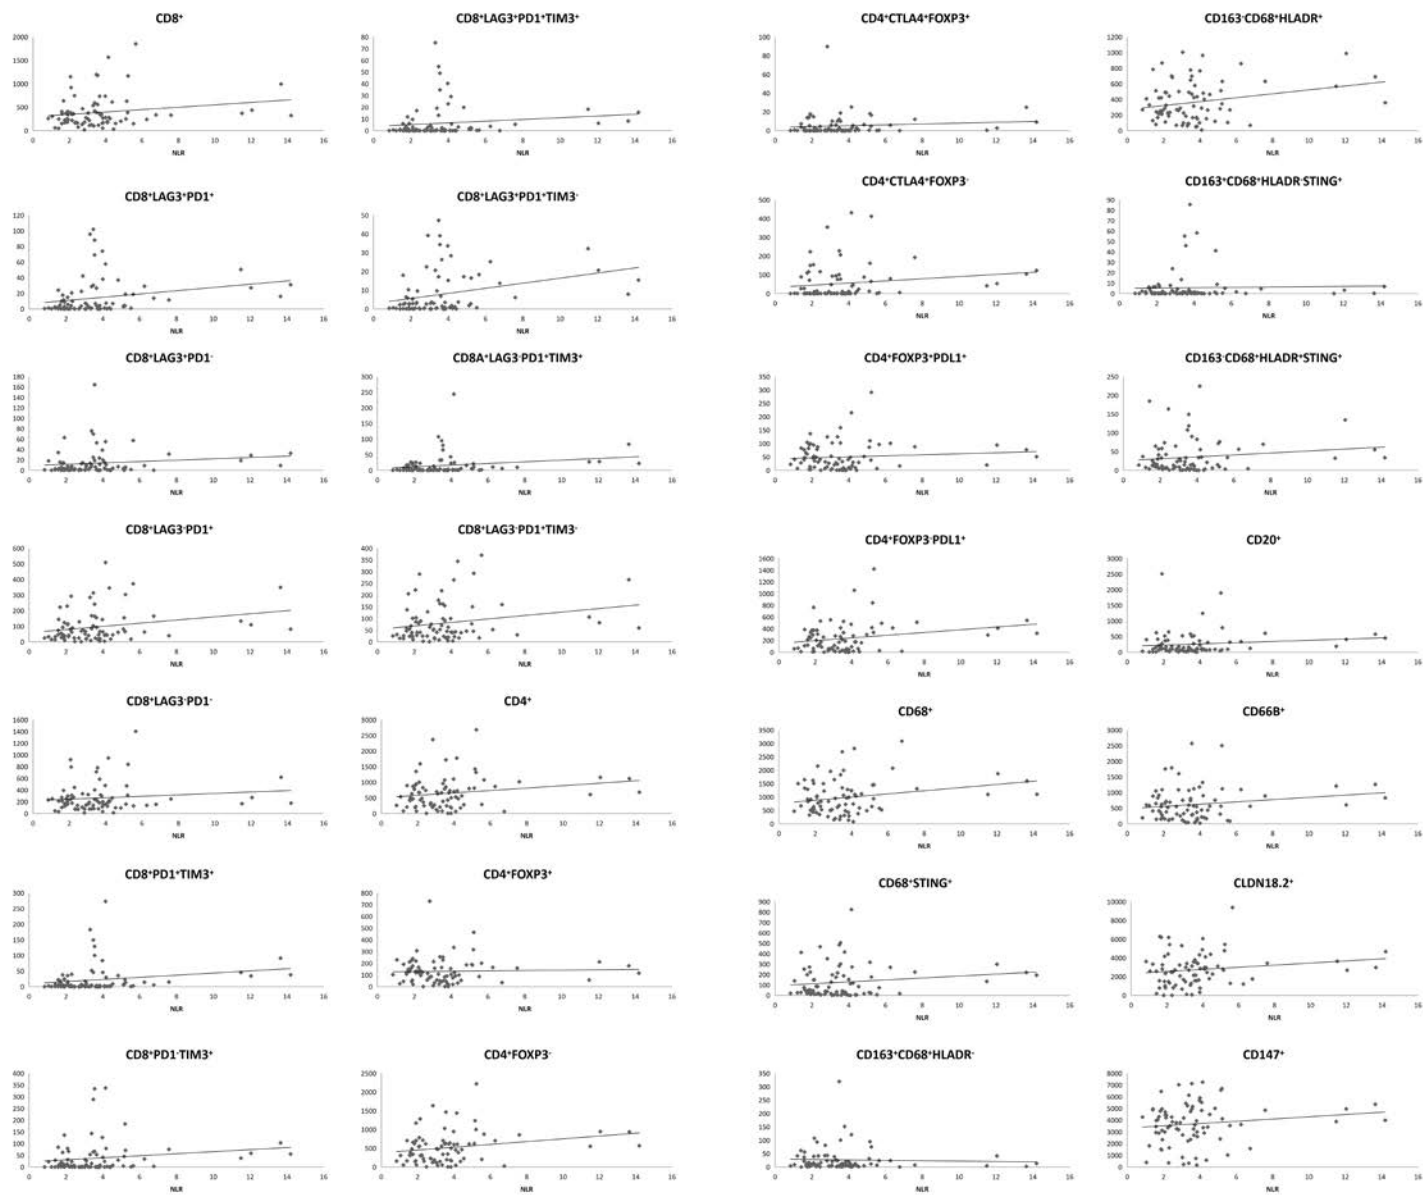

Supplementary Figure S1. The relationship of NLR with the density of immune cells in tumor core.

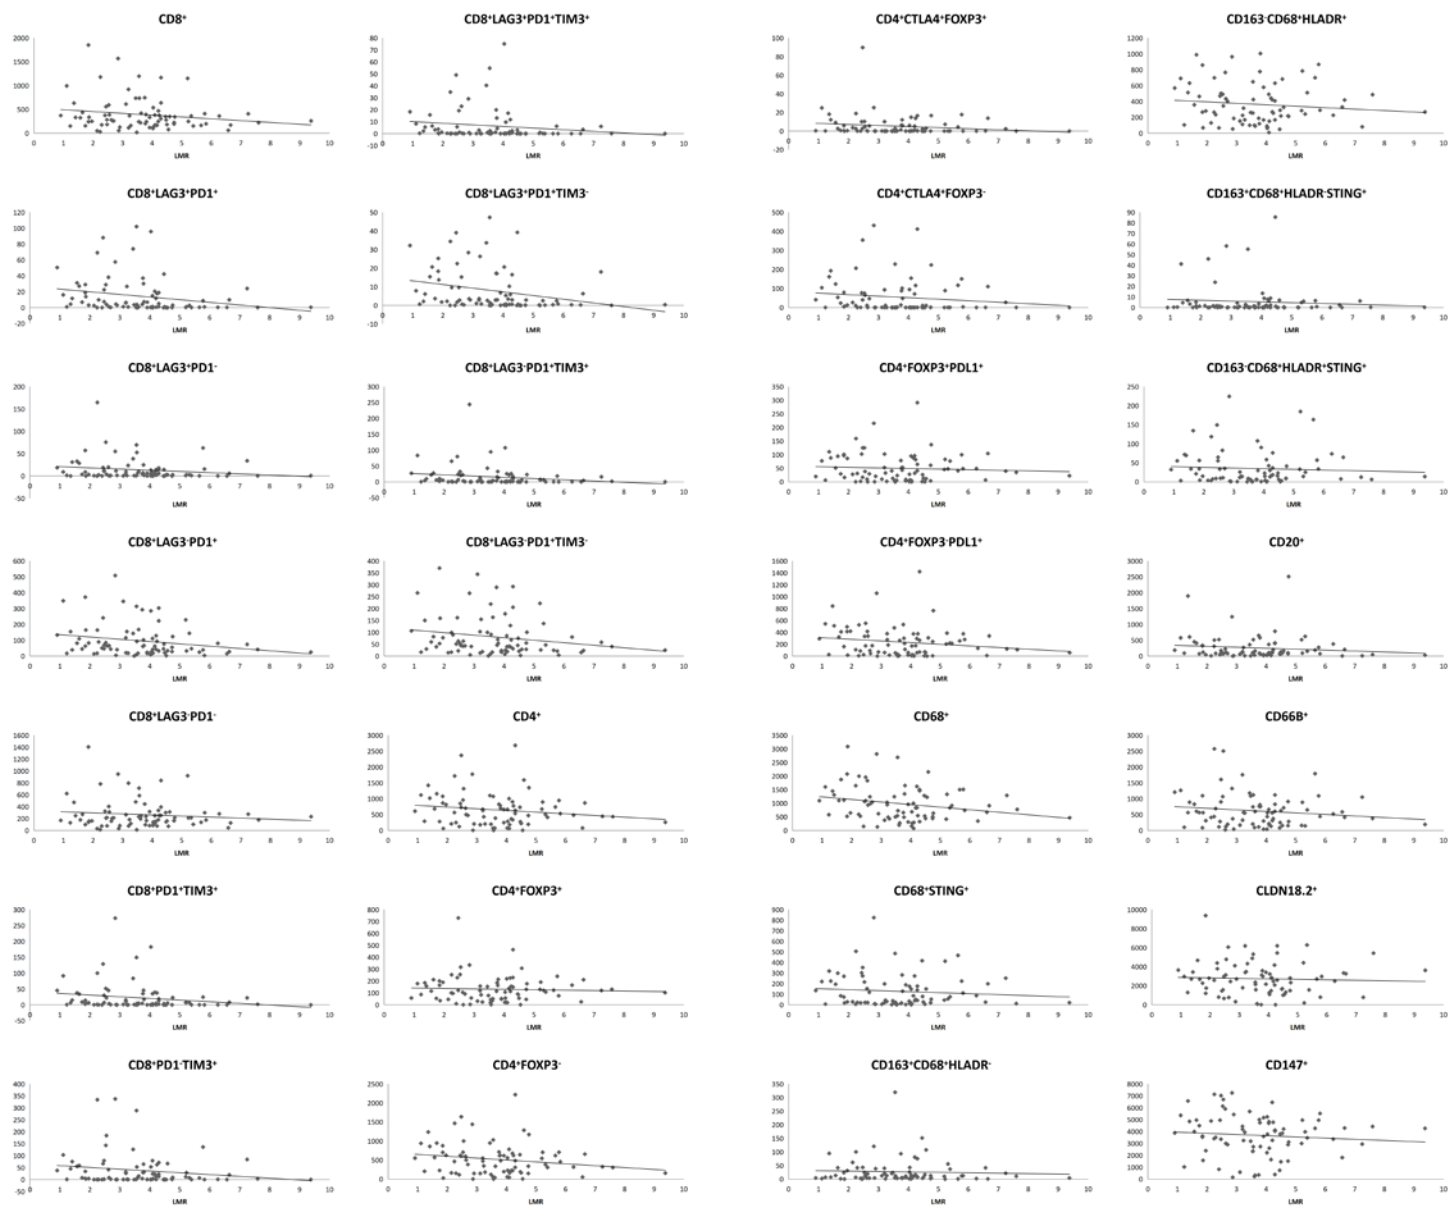

Supplementary Figure S2. The relationship of LMR with the density of immune cells in tumor core.

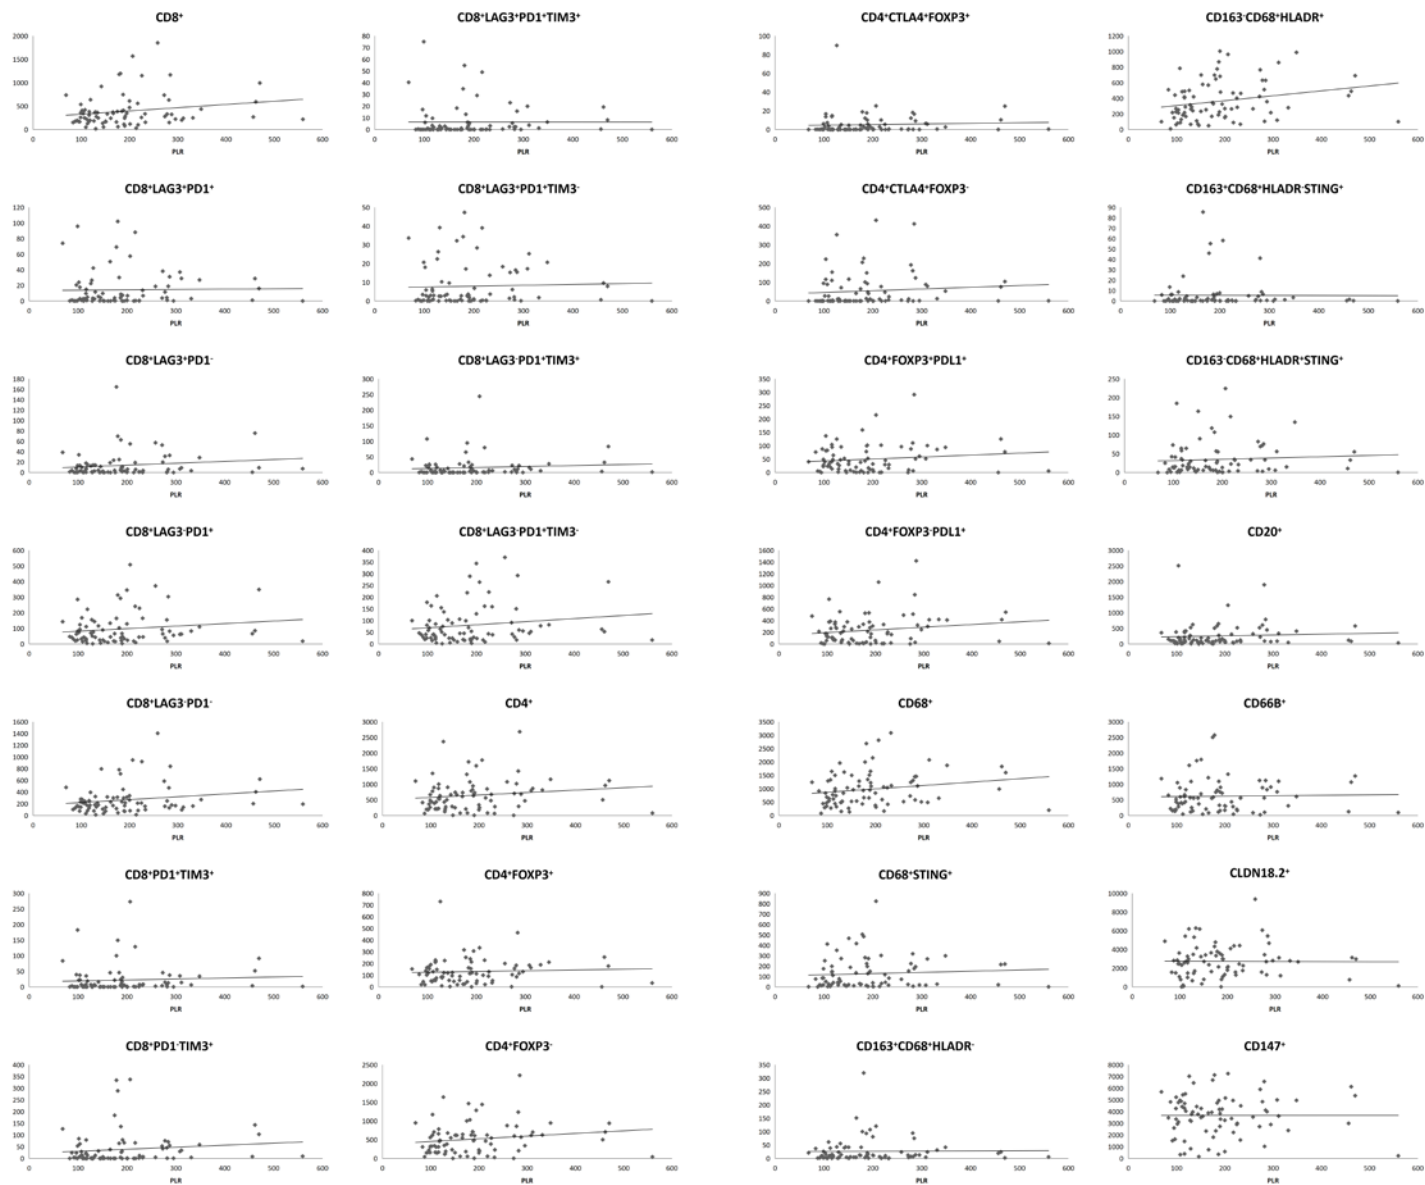

Supplementary Figure S3. The relationship of PLR with the density of immune cells in tumor core.

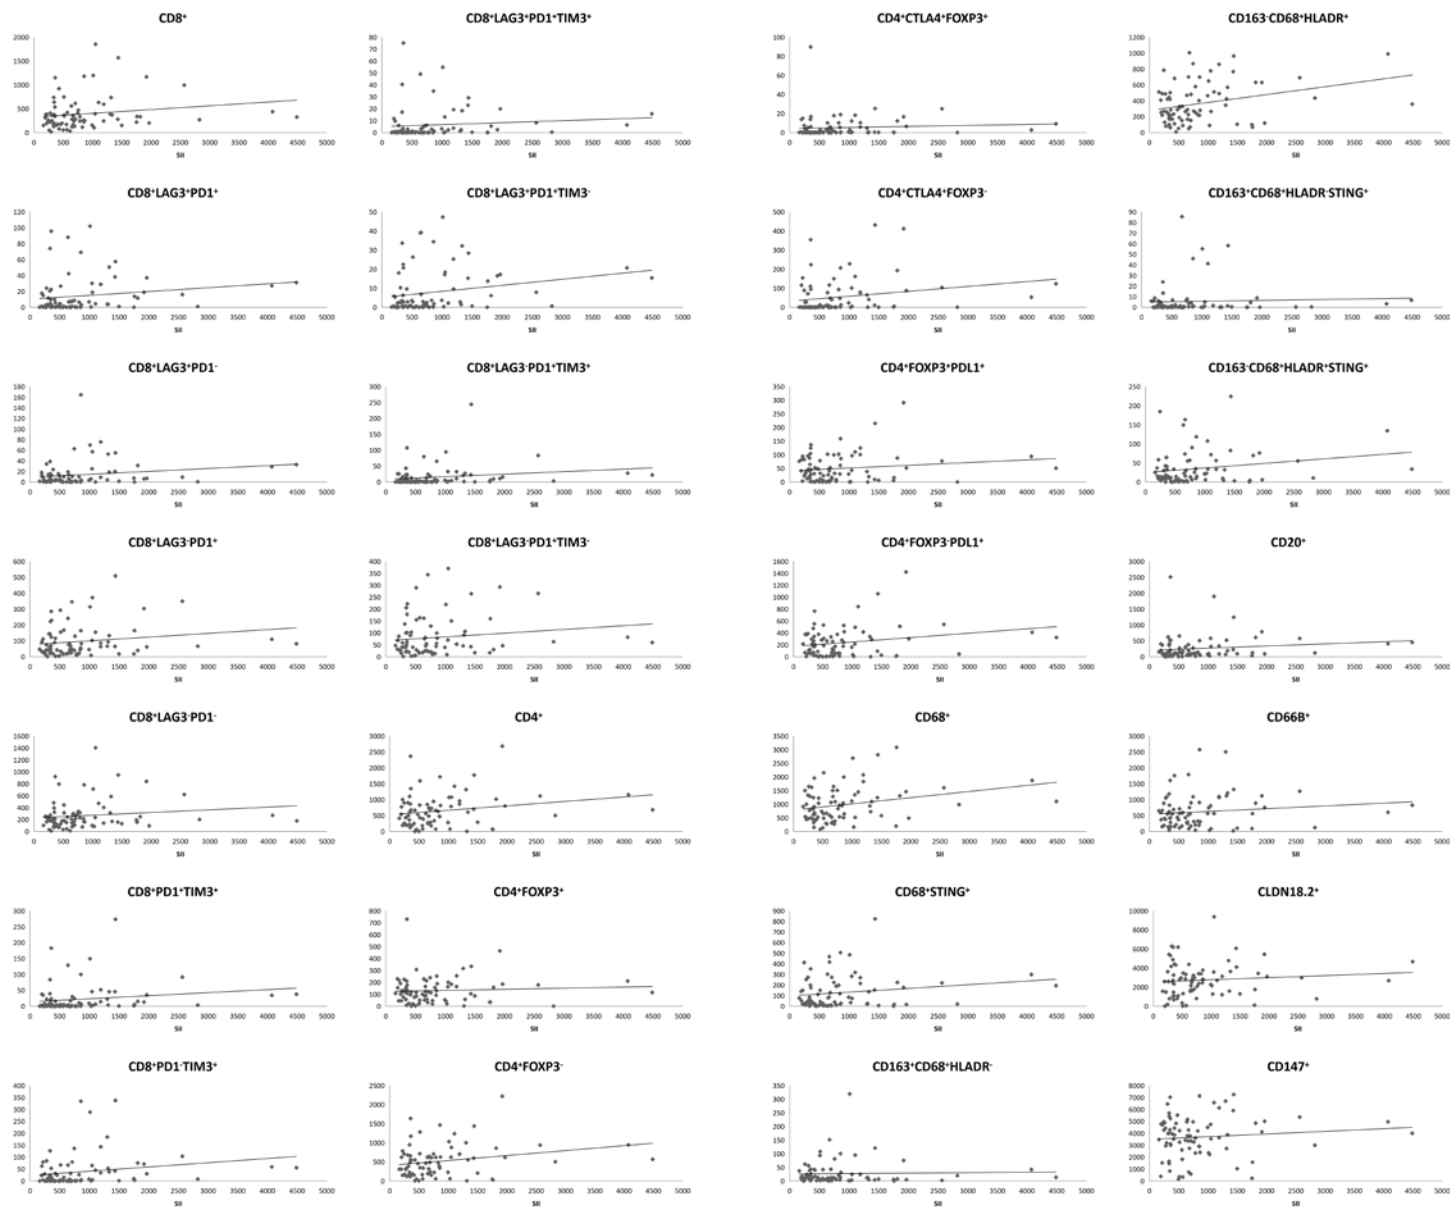

Supplementary Figure S4. The relationship of SII with the density of immune cells in tumor core.

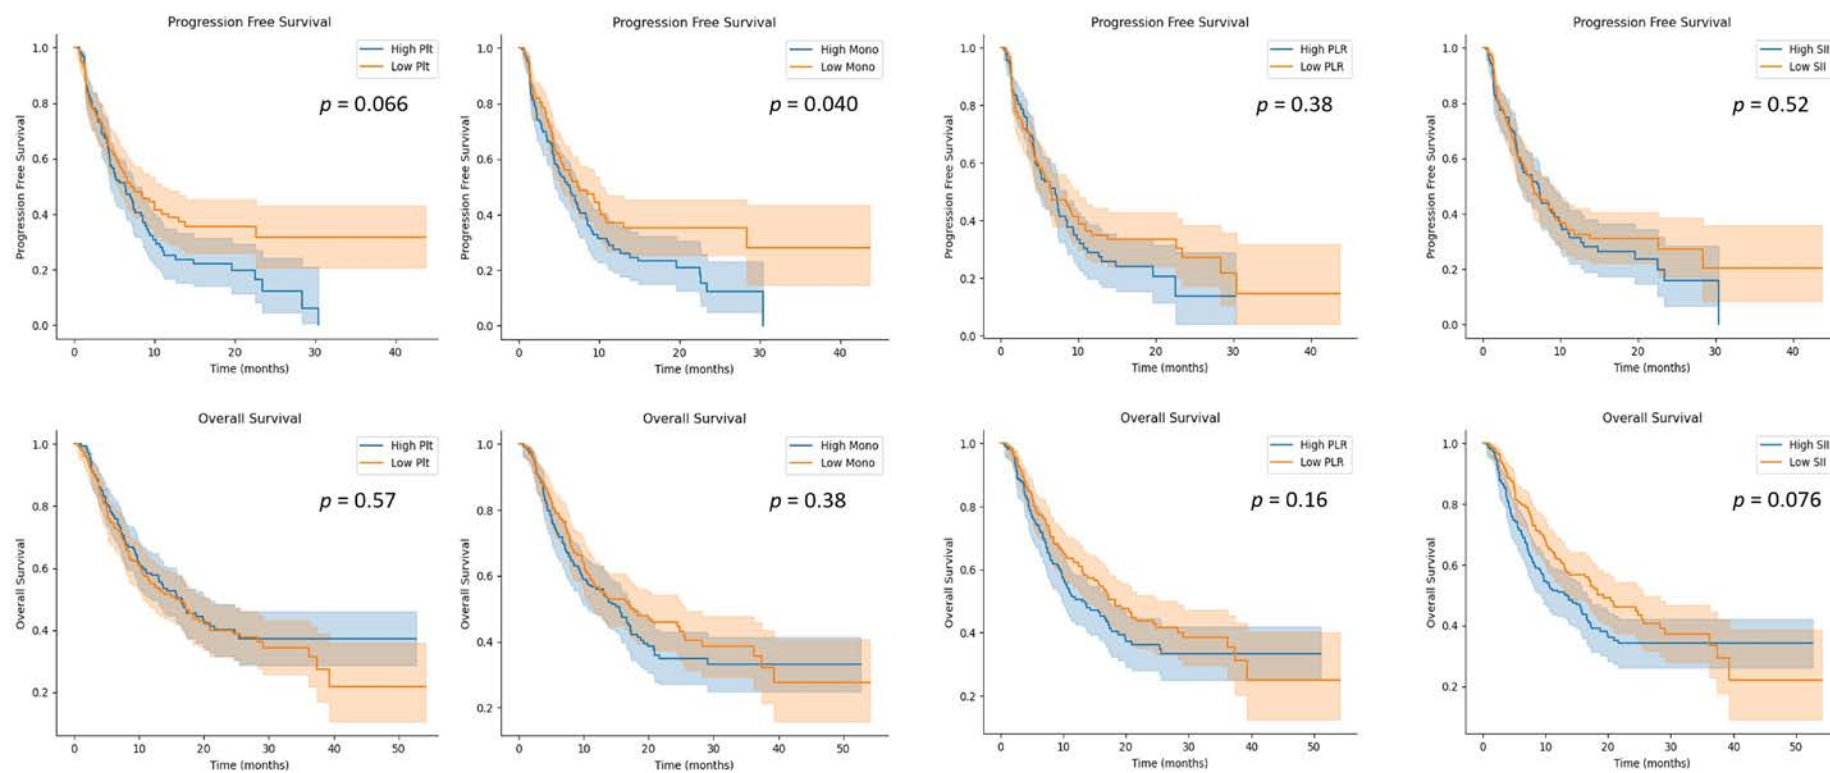

Supplementary Figure S5. Kaplan-Meier curves for progression-free survival and overall survival according to blood indexes (Plt, Mono, PLR, SII).
